# Supplementary material for: The responses of CO2 emission to nitrogen application and earthworm addition in the soybean cropland
Source: PeerJ journal article supplement (doi:10.7717/peerj.17176), 2024-03-26

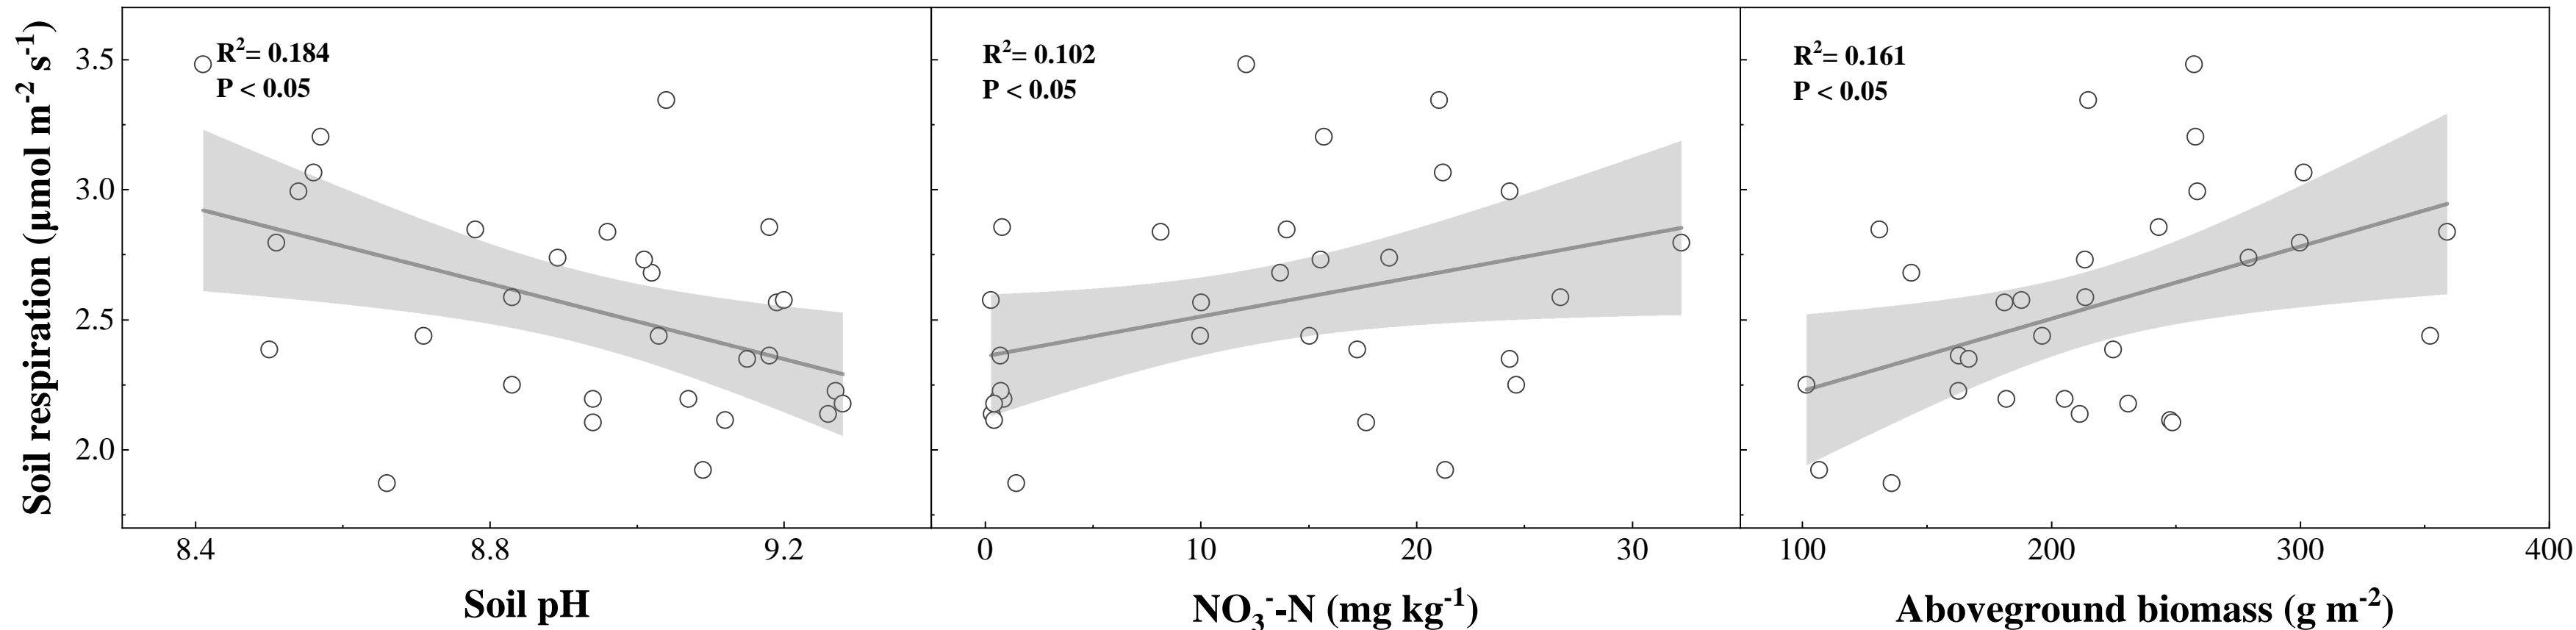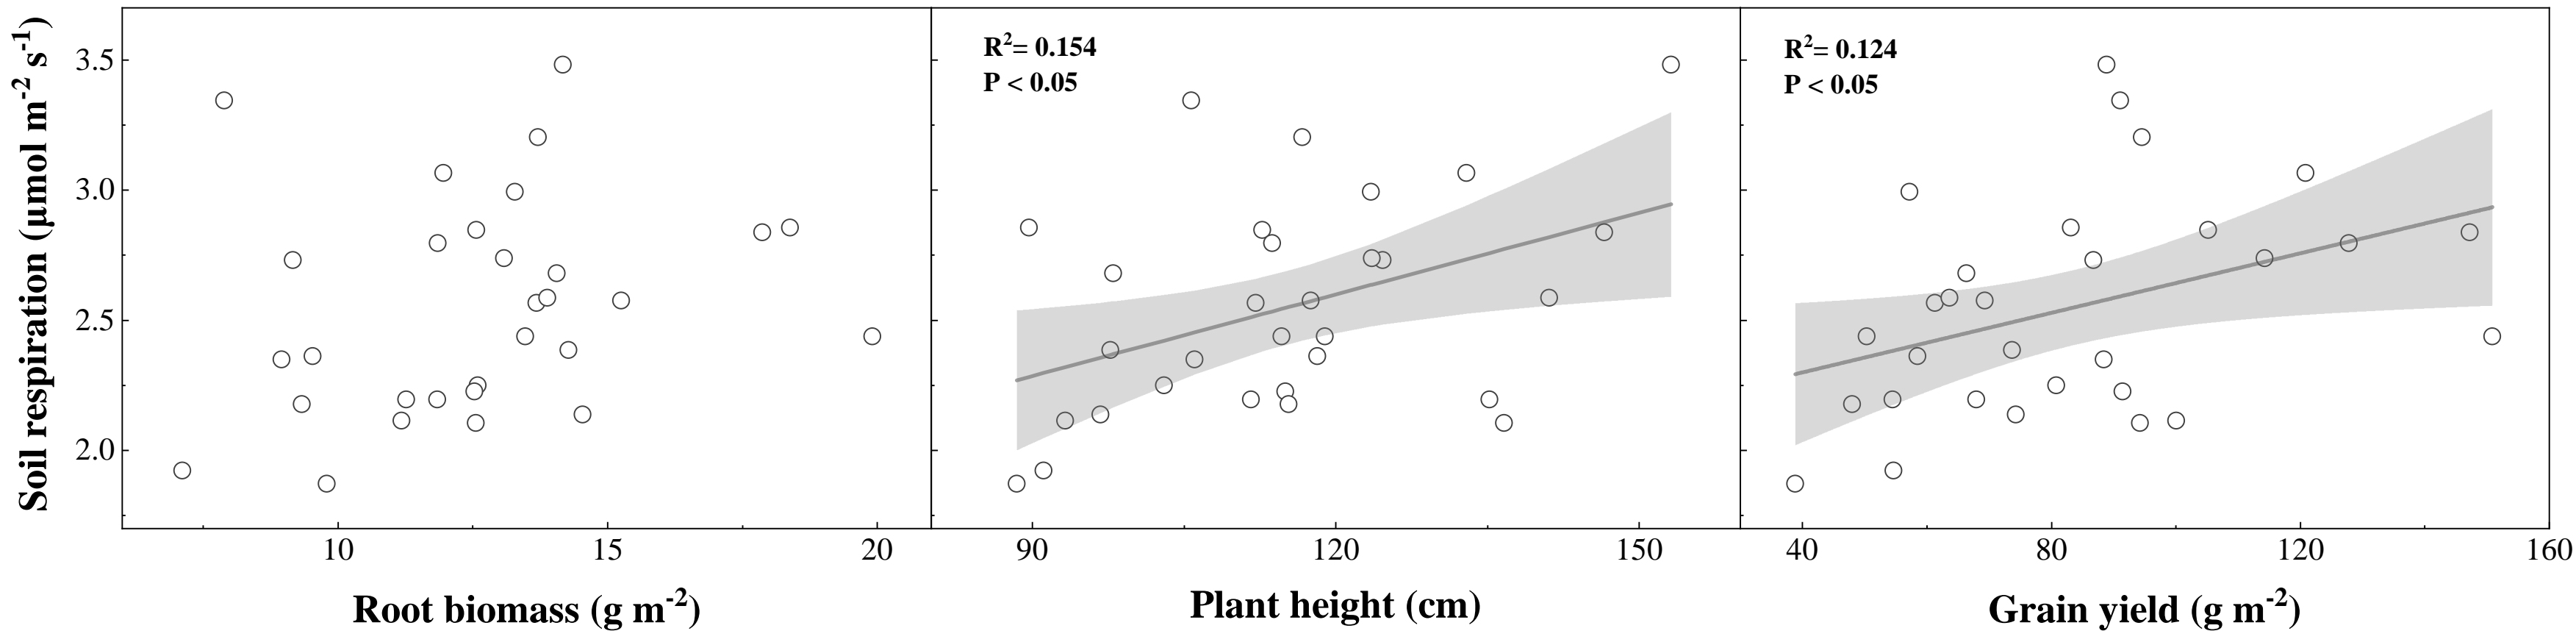

Supplement: FS1.pdf [file FS1.pdf]
