# Supplementary material for: The responses of CO2 emission to nitrogen application and earthworm addition in the soybean cropland
Source: PeerJ. 2024 Mar 26;12:e17176. doi: 10.7717/peerj.17176 (PMC10979750; doi:10.7717/peerj.17176)
Supplement: Supplemental Information 1 [file peerj-12-17176-s001.xlsx]

## Sheet: Sheet1
Treatment	SR	ST	SM	SWC	Soil pH	TN	TC	NO3--N	NH4+--N	PLH	AGB	RB	NPP	NGP	GRY	W100	Fungal richness	Fungal simpson	Fungal PCo1	Fungal PCo2	Bacterial richness	Bacterial simpson	Bacterial PCo1	Bacterial PCo2	Proteobacteria	Verrucomicrobia	Gammaproteobacteria	Thermoleophilia	Myxococcales	Corynebacteriales	Blastocladiomycetes	Sordariomycetes|o__	Agaricomycetes|o__
C	2.19519	27.3462	12.2342	0.0357942	9.07	0.680046	14.4306	0.606999	0.375463	135.222	205.31	11.84	88.3333	153.667	67.905	12.94	233.6	0.970034	-0.000907	0.18532	3422.9	0.999091	0.031589	-0.076916	0.27394	0.0133745	0.108048	0.0667029	0.0461659	0.00695882	0	0.0807224	0.000577073
C	2.13769	27.7538	12.2373	0.0230456	9.26	0.479845	13.0937	0.308296	0.222487	96.7407	211.36	14.54	50.5	81	74.29	14.68	366.2	0.943751	0.127266	-0.211034	3315.1	0.998895	-0.000648	-0.060368	0.270512	0.0128993	0.11606	0.0699956	0.0346244	0.00658542	0	0.0164296	0
C	2.11481	27.3769	13.9477	0.0246971	9.12	0.515911	13.8543	0.416488	1.04508	93.2593	247.75	11.18	74	130.333	100.04	13.83	316.2	0.95952	-0.028356	0.074549	3465.7	0.999158	0.109622	-0.099187	0.277233	0.0181948	0.112631	0.0636817	0.0473879	0.00417529	0	0.0244068	0.000814692
C	1.87231	27.9	14.5131	0.0454337	8.66	0.514601	13.6165	1.45418	0.56117	88.4444	135.86	9.79	45.6667	86	38.81	11.91	166.8	0.967736	-0.277525	0.11031	3237.8	0.999075	-0.161347	0.019509	0.274076	0.0141213	0.110255	0.0651753	0.0462337	0.0056689	0	0.082182	0.0128653
C	2.36096	27.9454	12.1654	0.0244465	9.18	0.485309	12.9258	0.698404	0.601647	118.185	162.94	9.53	64.625	112.75	58.48	13.61	396.3	0.970832	-0.116597	-0.042968	3434.6	0.999187	-0.167171	-0.015998	0.281001	0.0160562	0.116229	0.0730507	0.0520384	0.00498999	0	0.125395	0
NH	2.38481	27.7	12.1358	0.0302889	8.5	0.757477	13.3244	17.2448	4.34931	97.7407	224.93	14.28	57.6667	95.3333	73.66	14.81	264.3	0.951664	0.145489	-0.032372	3318.9	0.999085	0.16799	0.008361	0.310024	0.0128993	0.128823	0.0491191	0.0449438	0.00577073	0	0.0514953	0.00159544
NH	2.43692	27.4231	13.0931	0.0337928	8.71	0.649888	14.5297	9.96588	4.20955	114.63	196.34	13.47	42.3333	84	50.35	15.29	177.4	0.938031	0.117617	0.069548	3257.1	0.998854	0.085712	-0.075509	0.27876	0.0132387	0.110832	0.0611358	0.0400217	0.00471842	0	0.0388676	0.00122204
NH	2.68077	27.7308	13.0865	0.032811	9.02	0.703661	13.1173	13.6709	6.67797	98	143.77	14.06	52	89.6667	66.3637	14.2525	239.8	0.942826	0.056129	0.008793	3234.1	0.998993	-0.162932	-0.009959	0.29889	0.015547	0.140874	0.0696901	0.0417869	0.00767168	0.0056689	0.0500017	0.000780746
NH	1.92308	27.8069	12.8915	0.0359398	9.09	0.557616	13.0506	21.3398	4.14748	91.1111	106.82	7.12	54.25	96.75	54.665	12.84	124.8	0.955518	-0.282326	-0.434607	3256.9	0.999068	-0.118684	-0.002585	0.263689	0.0173461	0.114566	0.0640212	0.0414474	0.00577073	0	0.021148	0.00319088
NH	2.73077	28.0146	13.8008	0.023116	9.01	0.662176	13.4184	15.5553	2.36226	124.63	213.44	9.17	65	118	86.78	14.07	222.9	0.962358	-0.328404	0.057754	3362.3	0.999007	-0.166359	0.068246	0.283784	0.0141553	0.126922	0.078482	0.0290913	0.00515971	0.000577073	0.0556706	0
NL	3.48173	27.1692	13.9454	0.0434199	8.41	0.697923	14.7797	12.1013	1.03264	153.148	257.32	14.17	63.6667	128	88.85	15.33	194.8	0.924987	0.198428	-0.073894	5135.2	0.999126	0.149208	-0.073169	0.275603	0.0137819	0.119488	0.0520724	0.0405649	0.00835059	0	0.0461659	0
NL	3.20288	27.4692	12.3296	0.0354063	8.57	0.639786	13.4943	15.7014	1.49753	116.685	257.82	13.71	85.3333	165.667	94.5431	14.53	157.6	0.860414	0.245855	-0.155992	3361.8	0.998928	0.016037	0.108984	0.330833	0.0126956	0.140534	0.0475237	0.042364	0.0255949	0.000780746	0.0708442	0.000135782
NL	2.83692	27.3538	11.7962	0.0360073	8.96	0.680103	12.797	8.13442	2.32375	146.556	359.05	17.87	85.5	135.667	147.23	17.29	273.1	0.926782	0.226839	-0.053893	4733.8	0.99892	0.096007	-0.123523	0.241352	0.0060423	0.0992905	0.0576055	0.0309922	0.00546522	0	0.0389694	3.39e-05
NL	2.56538	27.7846	13.1842	0.0404569	9.19	0.437611	14.2214	10.0084	0.860334	112.074	181.24	13.68	54	100	61.27	13.03	104.6	0.801583	-0.229682	-0.319973	2940.3	0.99907	0.081054	-0.021854	0.314471	0.0133745	0.127499	0.0521742	0.0484063	0.0079093	0	0.013103	0.00295326
NL	2.24981	27.8231	12.59	0.0431448	8.83	0.503877	12.4498	24.6168	1.42856	103.019	101.68	12.59	72.125	132.333	80.8225	14.45	378.4	0.937009	0.10885	-0.011882	3286.1	0.99901	-0.113935	0.024067	0.285176	0.0110662	0.115788	0.0653111	0.0413117	0.00502393	0	0.0184324	0.000984419
E	2.19538	27.2154	12.3338	0.025858	8.94	0.623193	13.6978	0.865549	0.632537	111.611	181.95	11.27	52.3333	106.667	54.5	14.46	174.7	0.932023	-0.047321	0.087983	5058.3	0.999206	0.059529	-0.115752	0.26637	0.0123901	0.101836	0.0637157	0.0513256	0.00488815	0	0.280729	0
E	2.57519	27.5769	13.255	0.0222325	9.2	0.484127	13.5979	0.27515	0.838283	117.519	188	15.25	64.0833	111.417	69.27	14.82	371.4	0.931611	0.181251	0.047758	3117.6	0.995924	0.030362	-0.040055	0.265623	0.00465053	0.116467	0.0757663	0.0350657	0.00889372	0	0.0598459	0.000101836
E	2.85596	27.4538	12.2879	0.0576585	9.18	0.541648	14.5549	0.785855	1.18894	89.6667	243.23	18.38	88	143	83.12	15.02	187.3	0.948752	0.096784	0.13182	3077.6	0.998868	0.150979	-0.106811	0.286805	0.00760379	0.112088	0.0525816	0.0439255	0.00777352	0	0.0391731	0
E	2.22538	27.9069	12.4969	0.030748	9.27	0.453925	12.6742	0.728421	1.09618	115	162.58	12.53	68.6667	112.333	91.45	16.64	197.9	0.9042	-0.037349	-0.048241	3522.8	0.999024	-0.146073	-0.043843	0.266472	0.014936	0.113378	0.0811637	0.0458943	0.00699277	0	0.0313656	0.000339455
E	2.17769	27.9077	12.3415	0.0328767	9.28	0.495147	12.3287	0.429294	1.72497	115.333	230.82	9.33	47.3333	83.6667	48.01	14.94	299	0.92977	0.120484	-0.06065	3354.3	0.999034	-0.164672	-0.059041	0.279813	0.0122204	0.112665	0.0839811	0.051699	0.00465053	0	0.0802132	6.79e-05
E*NH	3.06538	27.4538	13.8875	0.0460152	8.56	0.624171	14.0902	21.2131	2.8016	132.926	301.33	11.96	55.3333	107.667	120.88	13.64	214.7	0.952258	-0.104093	0.243977	3266.4	0.999013	0.062373	0.045221	0.288265	0.00923317	0.133134	0.0558403	0.035473	0.00882583	0.00461659	0.0360501	0
E*NH	2.10462	27.5	13.8536	0.0320574	8.94	0.647945	14.2997	17.6566	1.97828	136.667	248.67	12.56	79.6667	145.333	94.27	14.05	212.9	0.956104	0.066528	-0.013981	2962.3	0.999079	0.069246	0.09207	0.311552	0.01497	0.137242	0.0603211	0.0380529	0.00723039	0	0.0737635	3.39e-05
E*NH	2.7375	27.5979	13.9402	0.0501217	8.8925	0.565512	13.7919	18.735	3.79537	123.565	279.262	13.08	68.4167	124.917	114.272	12.29	202	0.961021	-0.078581	0.058208	2945.5	0.998825	-0.053573	0.090586	0.309175	0.0119149	0.128042	0.0553311	0.0409043	0.00393768	0.0114396	0.0669744	0
E*NH	3.34308	27.7538	13.8084	0.0283457	9.04	0.475226	13.344	21.0448	3.82069	105.722	214.78	7.89	60	98.6667	91.05	16.29	283.4	0.931565	0.133479	-0.023992	3252.8	0.999	0.051176	0.037331	0.330018	0.00943684	0.160664	0.0637836	0.0368987	0.00553311	0	0.0668047	6.79e-05
E*NH	2.43692	27.6838	13.464	0.0260393	9.03	0.514706	13.4337	15.0258	6.5809	118.944	352.27	19.91	78.6667	148	150.89	17.38	242.4	0.9444	0.044967	0.025043	3098.7	0.998998	-0.124631	-0.05396	0.242914	0.0154791	0.0838453	0.0829628	0.0369327	0.00594046	0	0.0763773	0
E*NL	2.84615	27.5154	13.8558	0.0298913	8.78	0.613361	13.7647	13.9837	3.31116	112.759	131.02	12.57	68	124	105.19	13.6	247.2	0.970295	0.019944	0.130637	3417.2	0.999058	0.056301	-0.082981	0.249024	0.0107607	0.108693	0.071591	0.0366951	0.00570284	0	0.0427034	0
E*NL	2.99385	27.3231	13.37	0.0335145	8.54	0.693911	13.7875	24.3126	2.31396	123.481	258.64	13.28	50.6667	101.333	57.19	16.93	185.5	0.947059	-0.286239	0.166897	3350.5	0.998763	0.020002	0.097065	0.284293	0.0151057	0.117485	0.0586917	0.0322143	0.0222003	0.0141213	0.0504769	0.000135782
E*NL	2.34846	27.2923	13.4073	0.040072	9.15	0.875586	15.7228	24.3126	0.399845	106.037	166.75	8.96	48	80.3333	88.4525	15.72	291.4	0.972491	-0.089897	-0.029848	3142.9	0.999143	0.084297	-0.035577	0.292305	0.0109644	0.125191	0.0577752	0.0506806	0.00437897	3.39e-05	0.0228453	0.0164296
E*NL	2.79635	27.8	13.5808	0.0307058	8.51	0.615237	13.9149	32.2833	0.446881	113.741	299.85	11.85	82.6667	157.333	127.77	15.47	134.5	0.928352	0.099199	0.07286	2881.7	0.99739	0.148188	0.42028	0.280967	0.00356428	0.125564	0.0544486	0.0216233	0.00424319	0	0.0446044	0
E*NL	2.58538	28.3154	13.36	0.0255474	8.83	0.652608	12.9418	26.6708	1.55681	141.13	213.62	13.88	46.6667	71.6667	63.66	14.31	148.2	0.902106	-0.081834	0.041872	3184.2	0.998925	-0.089647	0.085369	0.271394	0.00733222	0.116671	0.0792627	0.034896	0.00417529	0.00302115	0.0712516	0
